# Supplementary material
Source: PubMed Central journal article supplement (PMC6641104)
Supplement: ao7b00285_si_001.pdf [file ao7b00285_si_001.pdf]

# Supporting Information

## **Assembly of Organosolv Lignin Residues into Submicron Spheres: the Effects of Granulating in Ethanol/Water Mixtures and Homogenization**

Xin Rao<sup>†</sup>, Yongzhuang Liu<sup>†</sup>, Qi Zhang<sup>†</sup>, Wenshuai Chen<sup>†</sup>, Yixing Liu<sup>†</sup>, Haipeng Yu<sup>†, \*</sup>

<sup>†</sup> Key laboratory of Bio-based Material Science and Technology of Ministry of Education,

Northeast Forestry University, Harbin, 150040, P. R. China

\* Corresponding: H. Yu. E-mail: yuhaipeng20000@gmail.com

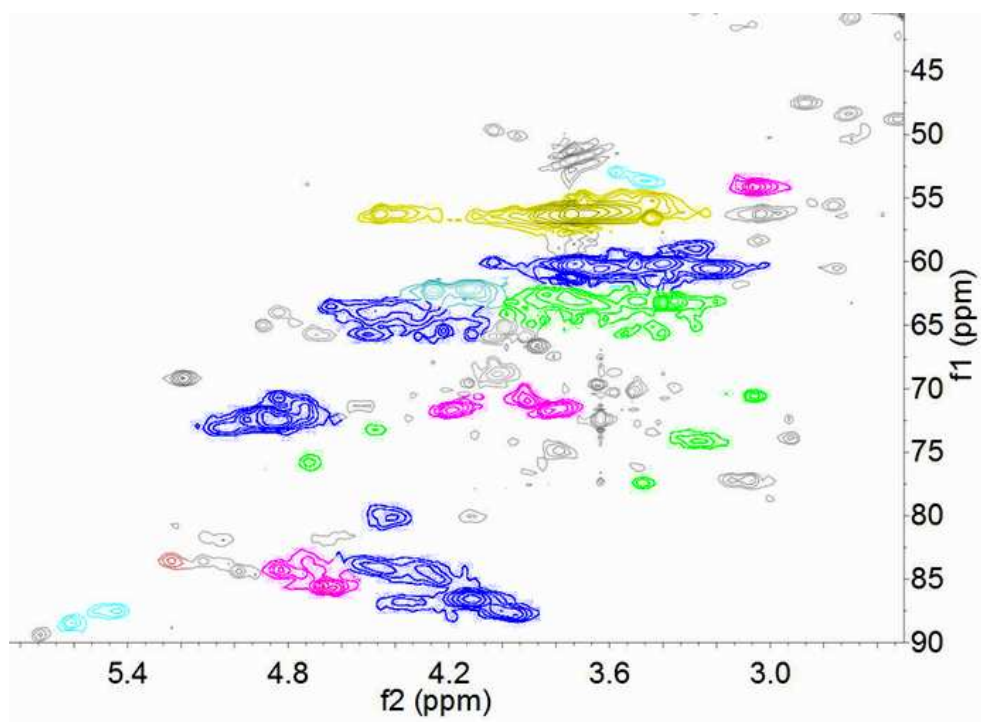

**Figure S1** 2D HSQC NMR of side chain region of MWL.

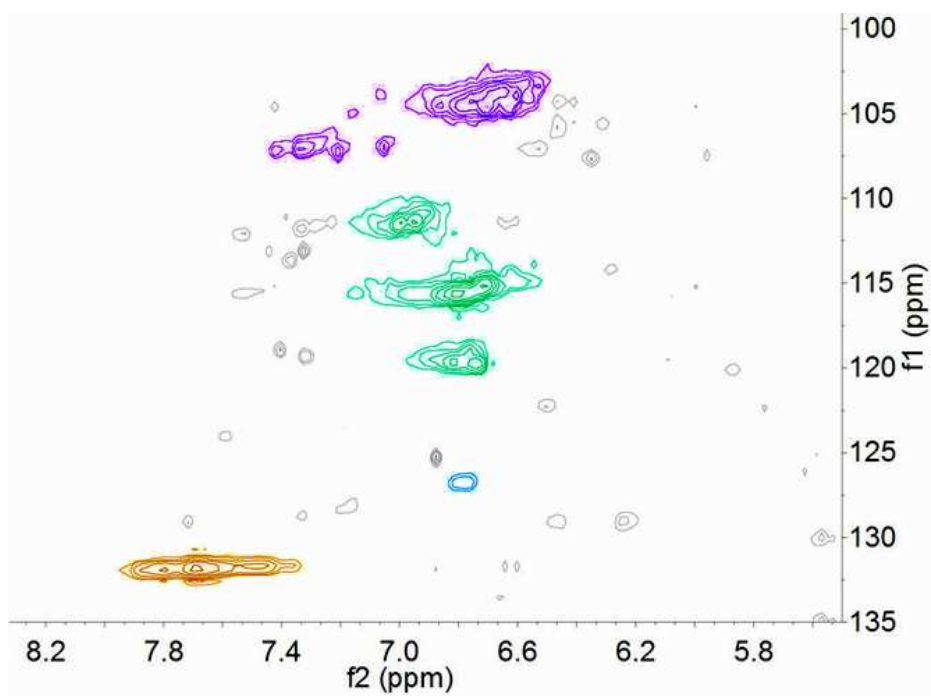

**Figure S2** 2D HSQC NMR of aromatic region of MWL.

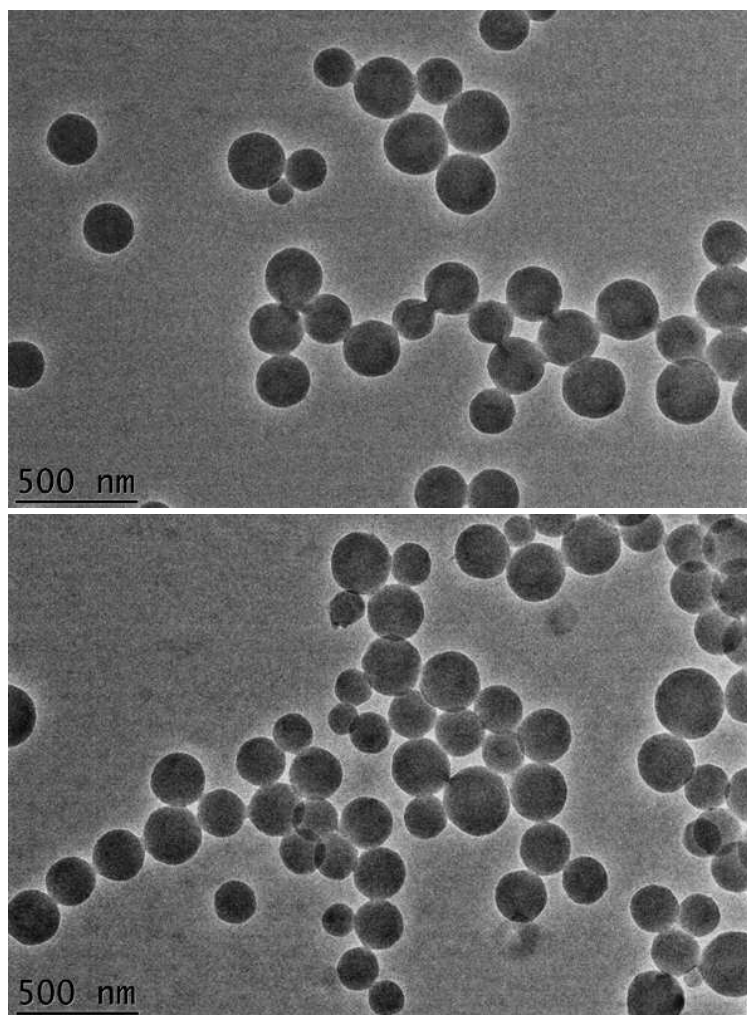

**Figure S3** The panoramic photos of OLR-based submicron spheres.
